# Supplementary material for: Ginger genome enables identification of SMPED1 causing sex-phase synchrony and outcrossing in a flowering plant
Source: Research Square preprint supplement (doi:10.21203/rs.3.rs-5849960/v1), 2025-02-13
Supplement: Supplementary file 1 [file 37f5f34326709ed545130668.docx]

**Supplementary Table 9** Genome resources for phylogenomic analysis.

| **Species** | **Reference** | **Accession number or ULR** |
| --- | --- | --- |
| *Salvinia cucullata* | Li *et al.*1 | NCBI project ID: PRJNA430459 |
| *Pinus lambertiana* | Stevens *et al*.2 | GenBank: GCA_001447015 |
| *Gnetum montanum* | Wan *et al*.3 | NCBI project ID: PRJNA339497 |
| *Welwitschia mirabilis* | Wan *et al*.4 | CNGB project ID: CNP0001943 |
| *Amborella trichopoda* | Albert *et al.*5 | NCBI project ID: PRJNA212863 |
| *Euryale ferox* | Yang *et al.*6 | NCBI project ID: PRJNA552436 |
| *Nymphaea colorata* | Zhang *et al.*7 | NCBI project ID: PRJNA565347 |
| *Acorus americanus* | Shi *et al.*8 | CNGB Project ID: CNP0001708 |
| *Spirodela polyrhiza* | Wang *et al.*9 | GenBank: ATDW00000000 |
| *Zostera marina* | Olsen *et al.*10 | NCBI project ID: PRJNA41721 |
| *Acanthochlamys bracteata* | Gao *et al.*11 | NCBI project ID: PRJNA703828 |
| *Dioscorea rotundata* | Tamiru *et al.*12 | DDBJ project ID: PRJDB3383 |
| *Allium cepa* | Finkers *et al.*13 | EMBL-EBI project ID: PRJEB29505 |
| *Asparagus officinalis* | Harkess *et al.*14 | CoGe ID: 33908 |
| *Apostasia shenzhenica* | Zhang *et al.*15 | NCBI project ID: PRJNA262478 |
| *Vanilla planifolia* | Hasing *et al.*16 | NCBI project ID: PRJNA633886 |
| *Gastrodia elata* | Bae *et al.*17 | GenBank: GCA_016760335 |
| *Dendrobium catenatum* | Ding *et al.*18 | GenBank: GCA_001605985 |
| *Phalaenopsis equestris* | Cai *et al.*19 | NCBI project ID: PRJNA192198 |
| *Musa acuminata* | D'Hont *et al.*20 | GenBank: GCA_000313855 |
| *Lanxangia tsao-ko* | Unpublished | N/A |
| *Wurfbainia villosum* | Unpublished | N/A |
| *Zingiber officinale* | Cheng *et al*.21 | GenBank: JACMSC000000000 |
| *Calamus simplicifolius* | Zhao *et al.*22 | EMBL-EBI project ID: PRJEB24031 |
| *Daemonorops jenkinsiana* | Zhao *et al.*22 | EMBL-EBI project ID: PRJEB24829 |
| *Phoenix dactylifera* | Hazzouri *et al.*23 | NCBI project ID: PRJNA322046 |
| *Areca catechu* | Yang *et al.*24 | CNGB Project ID: CNP0000517 |
| *Elaeis guineensis* | Singh *et al.*25 | NCBI project ID: PRJNA192219 |
| *Cocos nucifera* | Xiao *et al.*26 | NCBI project ID: PRJNA374600 |
| *Ananas comosus* | Feng *et al.*27 | CNGB Project ID: CNP0001166 |
| *Kobresia littledalei* | Can *et al.*28 | GenBank: SWLB00000000 |
| *Joinvillea ascendens* | McKain *et al.*29 | *Joinvillea ascendens* v1.1 at DOE-JGI, https://phytozome-next.jgi.doe.gov/info/Jascendens_v1_1 |
| *Pharus latifolius* | Ma *et al.*30 | NCBI project ID: PRJNA682003 |
| *Leersia perrieri* | Stein *et al.*31 | NCBI project ID: PRJNA163065 |
| *Oryza rufipogon* | Wei *et al.*32 | CNCB project ID: PRJCA002346 |
| *Oryza sativa* | Jain *et al.*33 | NCBI project ID: PRJNA448171 |
| *Olyra latifolia* | Guo *et al*.34 | http://www.genobank.org/bamboo |
| *Bonia amplexicaulis* | Guo *et al*.34 | http://www.genobank.org/bamboo |
| *Phyllostachys edulis* | Zhao *et al*.35 | GigaDB ID: 100498 |
| *Brachypodium distachyon* | Vogel *et al*.36 | GenBank: ADDN00000000 |
| *Hordeum vulgare* | Mascher *et al*.37 | *Hordeum vulgare* Morex V3 at DOE-JGI, https://phytozome-next.jgi.doe.gov/info/HvulgareMorex_V3 |
| *Secale cereale* | Li *et al*.38 | GenBank: JADQCU000000000 |
| *Triticum urartu* | Ling *et al*.39 | ENA: GCA_003073215 |
| *Aegilops tauschii* | Zhao *et al*.40 | NCBI project ID: PRJNA182898 |
| *Eragrostis curvula* | Carballo *et al*.41 | NCBI project ID: PRJNA508722 |
| *Eleusine coracana* | Devos *et al*.42 | NCBI project ID: PRJNA838475 |
| *Oropetium thomaeum* | VanBuren *et al*.43 | *Oropetium thomaeum* v1.0 at DOE-JGI, https://phytozome-next.jgi.doe.gov/info/Othomaeum_v1_0 |
| *Paspalum vaginatum* | Sun *et al*.44 | NCBI project ID: PRJNA234783 |
| *Coix lacryma-jobi* | Kang *et al*.45 | NCBI project ID: PRJNA573577 |
| *Sorghum bicolor* | McCormick *et al*.46 | GenBank: ABXC00000000 |
| *Eremochloa ophiuroides* | Wang *et al*.47 | NCBI project ID: PRJNA682293 |
| *Zea mays* | Hirsch *et al*.48 | *Zea mays* PH207 v1.1 at DOE-JGI, Phytozome genome ID: 443, http://phytozome-next.jgi.doe.gov |
| *Dichanthelium oligosanthes* | Studer *et al*.49 | GenBank: LWDX00000000 |
| *Panicum hallii* | Love *et al*.50 | NCBI project ID: PRJNA251785 |
| *Urochloa fusca* | Goodstein *et al*.51 | *Urochloa fusca* v1.1 at DOE-JGI, https://phytozome-next.jgi.doe.gov/info/Ufusca_v1_1 |
| *Cenchrus americanus* | Varshney *et al.*52 | GenBank: GCA_002174835 |
| *Setaria italica* | Bennetzen *et al.*53 | GenBank: AGNK02000000 |
| *Ceratophyllum demersum* | Yang *et al*.6 | NCBI project ID: PRJNA552433 |
| *Aristolochia fimbriata* | Qin *et al*.54 | CNCB project ID: PRJCA004207 |
| *Piper nigrum* | Hu *et al*.55 | NCBI project ID: PRJNA529758 |
| *Liriodendron chinense* | Shen *et al*.56 | https://treegenesdb.org/ |
| *Magnolia biondii* | Dong *et al*.57 | https://doi.org/10.5061/dryad.s4mw6m947 |
| *Chimonanthus salicifolius* | Lv *et al*.58 | http://xhhuanglab.cn/data/Chimonanthus_salicifolius.html |
| *Cinnamomum kanehirae* | Chaw *et al*.59 | NCBI project ID: PRJNA477266 |
| *Persea americana* | Rendon-Anaya *et al*.60 | NCBI project ID: PRJNA508502 |
| *Macleaya cordata* | Liu *et al*.61 | GenBank: GCA_002174775 |
| *Kingdonia uniflora* | Sun *et al*.62 | GenBank: GCA_014058105 |
| *Aquilegia coerulea* | Filiault *et al*.63 | *Aquilegia coerulea* v3.1 at DOE-JGI, https://phytozome-next.jgi.doe.gov/info/Acoerulea_v3_1 |
| *Coptis chinensis* | Liu *et al*.64 | NCBI project ID: PRJNA662860 |
| *Thalictrum thalictroides* | Arias *et al*.65 | NCBI project ID: PRJNA439007 |
| *Nelumbo nucifera* | Zheng *et al*.66 | CoGe ID: 60468 |
| *Macadamia integrifolia* | Falk *et al*.67 | https://treegenesdb.org/ |
| *Tetracentron sinense* | Li *et al*.68 | https://figshare.com/articles/dataset/Tetracentron_sinense_genome/12415928 |
| *Trochodendron aralioides* | Strijk *et al*.69 | GigaDB ID: 100657 |
| *Hydrangea quercifolia* | Goodstein *et al*.51 | *Hydrangea quercifolia* 'HQ6' v1.1at DOE-JGI, http://phytozome-next.jgi.doe.gov/info/Hquercifolia_v1_1". |
| *Camptotheca acuminata* | Zhao *et al*.70 | https://doi.org/10.5061/dryad.nc8qr |
| *Davidia involucrata* | Chen *et al*.71 | CNCB project ID: PRJCA001721 |
| *Nyssa sinensis* | Yang *et al*.72 | CoGe ID: 55419 |
| *Aegiceras corniculatum* | He *et al*.73 | CNCB project ID: PRJCA004930 |
| *Primula vulgaris* | Cocker *et al*.74 | http://opendata.earlham.ac.uk/primula. |
| *Diospyros oleifera* | Suo *et al*.75 | GigaDB ID: 100687 |
| *Clethra arborea* | Hartmann *et al*.76 | https://doi.org/10.5061/dryad.573n5tb4k |
| *Rhododendron williamsianum* | Soza *et al*.77 | CoGe ID: 51679 |
| *Vaccinium macrocarpon* | Diaz-Garcia *et al*.78 | https://www.vaccinium.org/ |
| *Actinidia chinensis* | Huang *et al*.79 | GenBank : AONS00000000 |
| *Roridula gorgonias* | Hartmann *et al*.76 | https://doi.org/10.5061/dryad.573n5tb4k |
| *Lonicera japonica* | Pu *et al*.80 | CNCB project ID: PRJCA001719 |
| *Apium graveolens* | Song *et al*.81 | GenBank: WRXP00000000 |
| *Coriandrum sativum* | Song *et al*.82 | http://cgdb.bio2db.com/ |
| *Daucus carota* | Wang *et al*.83 | NCBI project ID: PRJNA967095 |
| *Panax notoginseng* | Wang *et al*.84 | CNCB project ID: PRJCA008576 |
| *Cynara cardunculus* | Scaglione *et al*.85 | ENA: GCA_001531365 |
| *Carthamus tinctorius* | Wu *et al*.86 | https://safflower.scuec.edu.cn/ |
| *Taraxacum kok-saghyz* | Lin *et al*.87 | CNCB project ID: PRJCA005187 |
| *Lactuca sativa* | Reyes-Chin-Wo *et al*.88 | https://lgr.genomecenter.ucdavis.edu/ |
| *Chrysanthemum nankingense* | Song *et al*.89 | http://www.amwayabrc.com |
| *Helianthus annuus* | Badouin *et al*.90 | NCBI project ID: PRJNA485481 |
| *Stevia rebaudiana* | Xu *et al*.91 | https://doi.org/10.6084/m9.figshare.14169491.v1 |
| *Mikania micrantha* | Liu *et al*.92 | https://www.ncbi.nlm.nih.gov/datasets/genome/GCA_009363875.1/ |
| *Eucommia ulmoides* | Wuyun *et al*.93 | CNCB GWH: GWHBISF00000000 |
| *Coffea canephora* | Denoeud *et al*.94 | http://coffee-genome.org/download |
| *Chiococca alba* | Lau *et al*.95 | https://doi.org/10.5061/dryad.00000000r |
| *Gelsemium sempervirens* | Franke *et al*.96 | https://genomevolution.org/CoGe/SearchResults.pl?s=Gelsemium%20sempervirens&p=genome |
| *Calotropis gigantea* | Hoopes *et al*.97 | https://doi.org/10.5061/dryad.fk41r |
| *Catharanthus roseus* | Kellner *et al*.98 | https://datadryad.org/stash/dataset/doi:10.5061/dryad.hs593 |
| *Lithospermum erythrorhizon* | Auber *et al*.99 | NCBI project ID: PRJNA596998 |
| *Capsicum annuum* | Kim *et al*.100 | GenBank: ASJV00000000 |
| *Nicotiana attenuata* | Xu *et al*.101 | NCBI project ID: PRJNA317743 |
| *Petunia inflata* | Bombarely *et al*.102 | https://solgenomics.net/organism/Petunia_inflata/genome |
| *Solanum pennellii* | Bolger *et al*.103 | http://www.plabipd.de/portal/solanum-pennellii |
| *Cuscuta australis* | Sun *et al*.104 | http://groups.english.kib.cas.cn/epb/dgd/ |
| *Ipomoea nil* | Hoshino *et al*.105 | GenBank: GCA_001879475 |
| *Olea europaea* | Unver *et al*.106 | GenBank: MSRW00000000 |
| *Boea hygrometrica* | Xiao *et al*.107 | GenBank: GCA_001598015 |
| *Antirrhinum majus* | Li *et al*.108 | http://bioinfo.sibs.ac.cn/Am |
| *Sesamum indicum* | Wang *et al*.109 | NCBI project ID: PRJNA790654 |
| *Avicennia marina* | He *et al*.110 | https://evolution.sysu.edu.cn/Sequences.html |
| *Strobilanthes cusia* | Xu *et al*.111 | http://indigoid-plant.iflora.cn |
| *Handroanthus impetiginosus* | Silva-Junior *et al*.112 | GigaDB ID: 100379 |
| *Jacaranda mimosifolia* | Wang *et al*.113 | https://doi.org/10.6084/m9.figshare.14379086.v1. |
| *Mimulus guttatus* | Hellsten *et al*.114 | GenBank: APLE00000000 |
| *Erythranthe guttatus* | Hellsten *et al*.114 | GenBank: GCF_000504015 |
| *Lindenbergia philippensis* | Chen *et al*.115 | CNCB project ID: PRJCA010538 |
| *Phtheirospermum japonicum* | Cui *et al*.116 | https://doi.org/10.5061/dryad.vt4b8gtpt |
| *Striga asiatica* | Yoshida *et al*.117 | https://doi.org/10.5061/dryad.53t3574 |
| *Callicarpa americana* | Hamilton *et al*.118 | GigaDB ID: 100777 |
| *Tectona grandis* | Zhao *et al*.119 | GigaDB ID: 100550 |
| *Scutellaria baicalensis* | Xu *et al*.120 | CNCB GWH: GWHAOTP00000000 |
| *Perilla citriodora* | Zhang *et al*.121 | NCBI project ID: PRJNA431002 |
| *Origanum majorana* | Bornowski *et al*.122 | https://doi.org/10.5061/dryad.jwstqjq6t |
| *Rosmarinus officinalis* | Bornowski *et al*.122 | https://doi.org/10.5061/dryad.jwstqjq6t |
| *Salvia bowleyana* | Zheng *et al*.123 | CNCB GWH: GWHASIU00000000 |
| *Malania oleifera* | Xu *et al*.124 | GigaDB ID: 100549 |
| *Fagopyrum esculentum* | Yasui *et al*.125 | http://buckwheat.kazusa.or.jp/ |
| *Simmondsia chinensis* | Sturtevant *et al*.126 | CNCB GWH: GWHAASQ00000000 |
| *Selenicereus undatus* | Zheng *et al*.127 | GenBank: GCA_017589665 |
| *Portulaca amilis* | Gilman *et al*.128 | *Portulaca amilis* v1.0 at DOE-JGI, https://phytozome-next.jgi.doe.gov/info/Pamilis_v1_0 |
| *Amaranthus hypochondriacus* | Clouse *et al*.129 | *Amaranthus hypochondriacus* v2.1 at DOE-JGI, https://phytozome-next.jgi.doe.gov/info/Ahypochondriacus_v2_1 |
| *Suaeda aralocaspica* | Wang *et al*.130 | GigaDB ID: 100646 |
| *Beta vulgaris* | Rodriguez *et al*.131 | https://bvseq.boku.ac.at/index.shtml |
| *Spinacia oleracea* | Xu *et al*.132 | http://www.spinachbase.org/ |
| *Atriplex hortensis* | Hunt *et al*.133 | CoGe ID:56906 |
| *Vitis vinifera* | Jaillon *et al*.134 | *Vitis vinifera* v2.1 at DOE-JGI, https://phytozome-next.jgi.doe.gov/info/ Vvinifera_v2_1 |
| *Hamamelis virginiana* | Korgaonkar *et al*.135 | https://doi.org/10.6084/m9.figshare.13502001 |
| *Kalanchoe fedtschenkoi* | Yang *et al*.136 | GenBank: NQLW00000000 |
| *Rhodiola crenulata* | Fu *et al*.137 | GigaDB ID: 100301 |
| *Sonneratia alba* | He *et al*.110 | https://evolution.sysu.edu.cn/Sequences.html |
| *Punica granatum* | Falk *et al*.67 | https://treegenesdb.org/ |
| *Melastoma candium* | Chen *et al*.138 | GenBank: GCA_023653495 |
| *Rhodamnia argentea* | Detcharoen *et al*.139 | GenBank: GCA_020921035 |
| *Melaleuca alternifolia* | Voelker *et al*.140 | GenBank: GCA_019926035 |
| *Syzygium oleosum* |  | GenBank: GCA_021117445 |
| *Corymbia citriodora* | Healey *et al*.141 | GenBank: GCA_014858505 |
| *Eucalyptus_grandis* | Bartholome *et al*.142 | *Eucalyptus grandis* v2.0 at DOE-JGI, https://phytozome-next.jgi.doe.gov/info/ Egrandis_v2_0 |
| *Begonia fuchsioides* | Griesmann *et al*.143 | GigaDB: 101043 |
| *Datisca glomerata* | Griesmann *et al*.143 | GigaDB: 101046 |
| *Momordica charantia* | Matsumura *et al*.144 | GenBank: GCA_013281855 |
| *Cucurbita pepo* | Montero-Pau *et al*.145 | http://cucurbitgenomics.org/v2 |
| *Laqenaria siceraria* | Wu *et al*.146 | http://cucurbitgenomics.org/v2 |
| *Citrullus lanatus* | Guo *et al*.147 | http://cucurbitgenomics.org/v2 |
| *Benincasa hispida* | Xie *et al*.148 | http://cucurbitgenomics.org/v2 |
| *Cucumis melo* | Castanera *et al*.149 | http://cucurbitgenomics.org/v2 |
| *Luffa cylindnca* | Zhang *et al*.150 | http://cucurbitgenomics.org/v2 |
| *Sechium edule* | Fu *et al*.151 | http://cucurbitgenomics.org/v2 |
| *Trichosanthes anguina* | Ma *et al*.152 | http://cucurbitgenomics.org/v2 |
| *Ziziphus jujuba* | Yang *et al*.153 | CNCB project ID: PRJCA016173 |
| *Cannabis sativa* | Grassa *et al*.154 | GenBank: GCA_900626175 |
| *Parasponia andersonii* | van Velzen *et al*.155 | https://doi.org/10.5061/dryad.fq7gv88 |
| *Trema orientalis* | van Velzen *et al*.155 | https://doi.org/10.5061/dryad.fq7gv88 |
| *Boehmeria nivea* | Wang *et al*.156 | GenBank: GCA_021020685 |
| *Ficus erecta* | Shirasawa *et al*.157 | https://plantgarden.jp/ |
| *Artocarpus altilis* | Sahu *et al*.158 | https://bioinformatics.psb.ugent.be/orcae/aocc |
| *Morus notabilis* | Falk *et al*.67 | https://treegenesdb.org/ |
| *Rubus corchorifolius* | Yang *et al*.159 | GigaDB ID: 100465 |
| *Fragaria vesca* | Edger *et al*.160 | GigaDB ID: 100372 |
| *Rosa chinensis* | Saint-Oyant *et al*.161 | https://iris.angers.inra.fr/obh/ |
| *Dryas drummondii* | Griesmann *et al*.143 | GigaDB ID: 101047 |
| *Prunus avium* | Shirasawa *et al*.162 | http://cherry.kazusa.or.jp/ |
| *Gillenia trifoliata* | Ireland *et al*.163 | https://www.rosaceae.org/ |
| *Eriobotrya japonica* | Jiang *et al*.164 | GigaDB ID: 100711 |
| *Malus domestica* | Daccord *et al*.165 | https://www.rosaceae.org/ |
| *Pyrus betulifolia* | Dong *et al*.166 | CNCB project ID: PRJCA001404 |
| *Fagus sylvatica* | Falk *et al*.67 | https://treegenesdb.org/ |
| *Castanea dentata* | Westbrook *et al*.167 | Castanea dentata v1.1 at DOE-JGI, https://phytozome-next.jgi.doe.gov/info/ Cdentata_v1_1 |
| *Quercus suber* | Ramos *et al*.168 | GenBank: PKMF00000000 |
| *Juglans regia* | Falk *et al*.67 | https://treegenesdb.org/ |
| *Carya illinoinensis* | Huang *et al*.169 | GigaDB ID: 100571 |
| *Casuarina glauca* | Griesmann *et al*.143 | GigaDB ID: 101051 |
| *Corylus mandshurica* | Li *et al*.170 | http://doi.org/10.6084/m9.figshare.12523124.v1 |
| *Carpinus fangiana* | Yang *et al*.171 | https://doi.org/10.6084/m9.figshare.8549204.v6 |
| *Ostrya rehderiana* | Yang *et al*.172 | NCBI project ID: PRJNA428013 |
| *Alnus glutinosa* | Griesmann *et al*.143 | GigaDB ID: 101042 |
| *Betula platyphylla* | Falk *et al*.67 | https://treegenesdb.org/ |
| *Cercis canadensis* | Griesmann *et al*.143 | GigaDB ID: 101044 |
| *Mimosa pudica* | Griesmann *et al*.143 | GigaDB ID: 101049 |
| *Faidherbia albida* | Chang *et al*.173 | GigaDB ID: 101054 |
| *Chamaecrista fasciculata* | Griesmann *et al*.143 | GigaDB ID: 101045 |
| *Senna tora* | Kang *et al*.174 | http://nabic.rda.go.kr/Species/Senna_tora2 |
| *Lupinus angustifolius* | Hane *et al*.175 | NCBI project ID: PRJNA299755 |
| *Ammopiptanthus nanus* | Gao *et al*.176 | GigaDB ID: 100466 |
| *Nissolia schottii* | Griesmann *et al*.143 | GigaDB ID: 101050 |
| *Arachis ipaensis* | Lu *et al*.177 | https://doi.org/10.5061/dryad.hm5vs13 |
| *Aeschynomene evenia* | Quilbe *et al*.178 | http://aeschynomenebase.fr/ |
| *Dalbergia odorifera* | Hong *et al*.179 | GigaDB ID: 100760 |
| *Lotus japonicus* | Kamal *et al*.180 | CoGe ID: 58121 |
| *Cicer arietinum* | Varshney *et al*.181 | GigaDB ID: 100076 |
| *Pisum sativum* | Yang *et al*.182 | https://www.peagdb.com/ |
| *Medicago truncatula* | Tang *et al*.183 | *Medicago truncatula* Mt4.0v1 at DOE-JGI, https://phytozome-next.jgi.doe.gov/info/Mtruncatula_Mt4_0v1 |
| *Trifolium pratense* | De Vega *et al*.184 | *Trifolium pratense* v2 at DOE-JGI, https://phytozome-next.jgi.doe.gov/info/Tpratense_v2 |
| *Spatholobus suberectus* | Qin *et al*.185 | NCBI project ID: PRJNA482912 |
| *Cajanus cajan* | Varshney *et al*.186 | GigaDB ID: 100028 |
| *Amphicarpaea edgeworthi* | Song *et al*.187 | https://figshare.com/s/565549fb2611c26c229f |
| *Lablab purpureus* | Chang *et al*.173 | GigaDB ID: 101056 |
| *Phaseolus vulgaris* | Vlasova *et al*.188 | CoGe ID: 20365 |
| *Vigna radiata* | Liu *et al*.189 | https://doi.org/10.6084/m9.figshare.19583446 |
| *Tripterygium wilfordii* | Tu *et al*.190 | GenBank: JAAARO000000000 |
| *Rhizophora apiculata* | He *et al*.191 | CNCB project ID: PRJCA004930 |
| *Kandelia obovata* | Hu *et al*.192 | CNCB GWH: GWHACBH00000000 |
| *Passiflora organensis* | Costa *et al*.193 | CoGe ID: 59125 |
| *Populus alba* | Ma *et al*.194 | CNCB GWH: GWHAAEP00000000/ |
| *Salix purpurea* | Hyden *et al*.195 | CNCB project ID: PRJCA001824 |
| *Ricinus communis* | Chan *et al*.196 | *Ricinus communis* v0.1 at DOE-JGI, https://phytozome-next.jgi.doe.gov/info/Rcommunis_v0_1 |
| *Euphorbia lathyris* | Wang *et al*.197 | https://doi.org/10.6084/m9.figshare.14909913.v1 |
| *Hevea brasiliensis* | Falk *et al*.67 | https://treegenesdb.org/ |
| *Manihot esculenta* | Bredeson *et al*.198 | *Manihot esculenta* v8.1 at DOE-JGI, https://phytozome-next.jgi.doe.gov/info/Mesculenta_v8_1 |
| *Vernicia fordii* | Cui *et al*.199 | CNCB GWH: GWHAAEU00000000/ |
| *Jatropha curcas* | Sato *et al*.200 | http://www.kazusa.or.jp/jatropha/ |
| *Cephalotus follicularis* | Fukushima *et al*.201 | https://doi.org/10.5061/dryad.50tq3 |
| *Averrhoa carambola* | Wu *et al*.202 | CNCB GWH: GWHABKE00000000 |
| *Xanthoceras sorbifolium* | Bi *et al*.203 | GigaDB ID: 100606 |
| *Acer yangbiense* | Yang *et al*.204 | GigaDB ID: 100610 |
| *Sapindus mukorossi* | Xu *et al*.205 | CNCB project ID: PRJCA006298 |
| *Dimocarpus longan* | Lin *et al*.206 | GigaDB ID: 100276 |
| *Toona sinensis* | Ji *et al*.207 | CNGB Project ID: CNP0000958 |
| *Citrus sinensis* | Xiong *et al*.208 | https://zenodo.org/records/8174988 |
| *Poncirus trifoliata* | Peng *et al*.209 | *Poncirus trifoliata* v1.3.1 at DOE-JGI, https://phytozome-next.jgi.doe.gov/info/Ptrifoliata_v1_3_1 |
| *Sclerocarya birrea* | Chang *et al*.173 | GigaDB ID: 101057 |
| *Pistacia vera* | Zeng *et al*.210 | CNCB GWH: GWHAAAP00000000 |
| *Anacardium occidentale* | Savadi *et al*.211 | *Anacardium occidentale* v0.9 at DOE-JGI, https://phytozome-next.jgi.doe.gov/info/Aoccidentale_v0_9 |
| *Mangifera indica* | Li *et al*.212 | CNCB GWH: GWHABLA00000000/ |
| *Aquilaria sinensis* | Ding *et al*.213 | GigaDB ID: 100702 |
| *Corchorus capsularis* | Zhang *et al*.214 | CNCB project ID: PRJCA002486 |
| *Theobroma cacao* | Motamayor *et al*.215 | *Theobroma cacao* v2.1 at DOE-JGI, https://phytozome-next.jgi.doe.gov/info/Tcacao_v2_1 |
| *Herrania umbratica* | Hong *et al*.216 | GenBank: GCA_002168275 |
| *Durio zibethinus* | Teh *et al*.217 | NCBI project ID: PRJNA400310 |
| *Bombax ceiba* | Gao *et al*.218 | GigaDB ID: 100445 |
| *Hibiscus cannabinus* | Zhang *et al*.219 | CNCB GWH: GWHACDB00000000/ |
| *Gossypium australe* | Chen *et al*.220 | ftp://ftp.bioinfo.wsu.edu/ |
| *Moringa oleifera* | Chang *et al*.173 | GigaDB ID: 101058 |
| *Carica papaya* | Ming *et al*.221 | *Carica papaya* ASGPBv0.4 at DOE-JGI, https://phytozome-next.jgi.doe.gov/info/Cpapaya_ASGPBv0_4 |
| *Tarenaya hassleriana* | Cheng *et al*.222 | NCBI project ID: PRJNA175230 |
| *Aethionema arabicum* | Haudry *et al*.223 | http://brassicadb.cn/ |
| *Euclidium syriacum* | Goodstein *et al*.51 | *Euclidium syriacum* v1.1 at DOE-JGI, https://phytozome-next.jgi.doe.gov/info/Dstrictus_v2_1 |
| *Diptychocarpus strictus* | Goodstein *et al*.51 | *Diptychocarpus strictus* v2.1 at DOE-JGI, https://phytozome-next.jgi.doe.gov/info/Dstrictus_v2_1 |
| *Cardamine hirsuta* | Gan *et al*.224 | https://chi.mpipz.mpg.de/assembly.html |
| *Leavenworthia alabamica* | Haudry *et al*.223 | http://brassicadb.cn/ |
| *Rorippa islandica* | Goodstein *et al*.51 | *Rorippa islandica* v1.1 at DOE-JGI, https://phytozome-next.jgi.doe.gov/info/Rislandica_v1_1 |
| *Descurainia sophioides* | Goodstein *et al*.51 | *Descurainia sophioides* v1.1 at DOE-JGI, https://phytozome-next.jgi.doe.gov/info/Dsophioides_v1_1 |
| *Malcolmia maritima* | Goodstein *et al*.51 | *Malcolmia maritima* v1.1 at DOE-JGI, https://phytozome-next.jgi.doe.gov/info/Mmaritima_v1_1 |
| *Arabidopsis thaliana* | Kaul *et al*.225 | http://brassicadb.cn/ |
| *Boechera stricta* | Lee *et al*.226 | http://brassicadb.cn/ |
| *Capsella rubella* | Slotte *et al*.227 | http://brassicadb.cn/ |
| *Iberis amara* | Goodstein *et al*.51 | Iberis amara v1.1 at DOE-JGI, https://phytozome-next.jgi.doe.gov/info/Iamara_v1_1 |
| *Lobularia maritima* | Huang *et al*.228 | CNCB project ID: PRJCA002888 |
| *Megadenia pygmaea* | Yang *et al*.229 | CNCB project ID: PRJCA002905 |
| *Lunaria annua* | Goodstein *et al*.51 | *Lunaria annua* v1.1 at DOE-JGI, https://phytozome-next.jgi.doe.gov/info/Lannua_v1_1 |
| *Draba nivalis* | Nowak *et al*.230 | https://doi.org/10.5061/dryad.pg4f4qrm4 |
| *Arabis alpina* | Willing *et al*.231 | http://brassicadb.cn/ |
| *Megacarpaea delavayi* | Yang *et al*.232 | CNCB project ID: PRJCA002887 |
| *Microthlaspi erraticum* | Mishra *et al*.233 | NCBI project ID: PRJEB35998 |
| *Thlaspi arvense* | Dorn *et al*.234 | http://brassicadb.cn/ |
| *Eutrema salsugineum* | Yang *et al*.235 | *Eutrema salsugineum* v1.0 at DOE-JGI, https://phytozome-next.jgi.doe.gov/info/Esalsugineum_v1_0 |
| *Thellungiella halophila* | Yang *et al*.235 | http://brassicadb.cn/ |
| *Schrenkiella parvula* | Dassanayake *et al*.236 | http://brassicadb.cn/ |
| *Myagrum perfoliatum* | Goodstein *et al*.51 | *Myagrum perfoliatum* v2.1 at DOE-JGI, https://phytozome-next.jgi.doe.gov/info/Mperfoliatum_v2_1 |
| *Sisymbrium irio* | Haudry *et al*.223 | http://brassicadb.cn/ |
| *Cakile maritima* | Goodstein *et al*.51 | *Cakile maritima* v1.1 at DOE-JGI, https://phytozome-next.jgi.doe.gov/info/Cmaritima_v1_1 |
| *Crambe hispanica* | Goodstein *et al*.51 | *Crambe hispanica* v1.1 at DOE-JGI, https://phytozome-next.jgi.doe.gov/info/Chispanica_v1_1 |
| *Crucihimalaya himalaica* | Zhang *et al*.237 | http://brassicadb.cn/ |
| *Brassica oleracea* | Liu *et al*.238 | http://brassicadb.cn/ |
| *Raphanus sativus* | Zhang *et al*.239 | http://brassicadb.cn/ |

**References**

1. Li F-W*, et al.* Fern genomes elucidate land plant evolution and cyanobacterial symbioses. *Nat. Plants* **4**, 460–472 (2018).

2. Stevens KA*, et al.* Sequence of the sugar pine megagenome. *Genetics* **204**, 1613–1626 (2016).

3. Wan T*, et al.* A genome for gnetophytes and early evolution of seed plants. *Nat. Plants* **4**, 82–89 (2018).

4. Wan T*, et al.* The *Welwitschia* genome reveals a unique biology underpinning extreme longevity in deserts. *Nat. Commun.* **12**, 42–47 (2021).

5. Albert VA*, et al.* The *Amborella* genome and the evolution of flowering plants. *Science* **342**, 1241089 (2013).

6. Yang Y*, et al.* Prickly waterlily and rigid hornwort genomes shed light on early angiosperm evolution. *Nat. plants* **6**, 215–222 (2020).

7. Zhang L*, et al.* The water lily genome and the early evolution of flowering plants. *Nature* **577**, 79–84 (2020).

8. Shi T*, et al.* The slow-evolving *Acorus tatarinowii* genome sheds light on ancestral monocot evolution. *Nat. Plants* **8**, 764–777 (2022).

9. Wang W*, et al.* The *Spirodela polyrhiza* genome reveals insights into its neotenous reduction fast growth and aquatic lifestyle. *Nat. Commun.* **5**, 3311 (2014).

10. Olsen JL*, et al.* The genome of the seagrass *Zostera marina* reveals angiosperm adaptation to the sea. *Nature* **530**, 331–335 (2016).

11. Gao Z-Y, Li Z-H, Lin D-L, Jin X-H. Chromosome-scale genome assembly of the resurrection plant *Acanthochlamys bracteata* (Velloziaceae). *Genome Biol. Evol.* **13**, evab147 (2021).

12. Tamiru M*, et al.* Genome sequencing of the staple food crop white Guinea yam enables the development of a molecular marker for sex determination. *Bmc Biol.* **15**, 86 (2017).

13. Finkers R*, et al.* Insights from the first genome assembly of onion (*Allium cepa*). *G3* **11**, jkab243 (2021).

14. Harkess A*, et al.* The asparagus genome sheds light on the origin and evolution of a young Y chromosome. *Nat. Commun.* **8**, 1279 (2017).

15. Zhang G-Q*, et al.* The *Apostasia* genome and the evolution of orchids. *Nature* **549**, 379–383 (2017).

16. Hasing T, Tang H, Brym M, Khazi F, Huang T, Chambers AH. A phased *Vanilla planifolia* genome enables genetic improvement of flavour and production. *Nat. Food* **1**, 811–819 (2020).

17. Bae E-K*, et al.* Chromosome-level genome assembly of the fully mycoheterotrophic orchid *Gastrodia elata*. *G3* **12**, jkab433 (2022).

18. Ding X*, et al.* Genome survey sequencing for the characterization of genetic background of *Dracaena cambodiana* and its defense response during dragon's blood formation. *PLoS One* **13**, e0209258 (2018).

19. Cai J*, et al.* The genome sequence of the orchid *Phalaenopsis equestris*. *Nat. Genet.* **47**, 65–72 (2015).

20. D'Hont A*, et al.* The banana (*Musa acuminata*) genome and the evolution of monocotyledonous plants. *Nature* **488**, 213–217 (2012).

21. Cheng S-P*, et al.* Haplotype-resolved genome assembly and allele-specific gene expression in cultivated ginger. *Hortic. Res.* **8**, 188 (2021).

22. Zhao H*, et al.* The chromosome-level genome assemblies of two rattans (*Calamus simplicifolius* and *Daemonorops jenkinsiana*). *Gigascience* **7**, giy097 (2018).

23. Hazzouri KM*, et al.* Genome-wide association mapping of date palm fruit traits. *Nat. Commun.* **10**, 4680 (2019).

24. Yang Y*, et al.* Chromosome-scale genome assembly of areca palm (*Areca catechu*). *Mol. Ecol. Resour.* **21**, 2504–2519 (2021).

25. Singh R*, et al.* Oil palm genome sequence reveals divergence of interfertile species in Old and New Worlds. *Nature* **500**, 335–339 (2013).

26. Xiao Y*, et al.* The genome draft of coconut (*Cocos nucifera*). *Gigascience* **6**, 1-11 (2017).

27. Feng L*, et al.* The highly continuous reference genome of a leaf-chimeric red pineapple (*Ananas comosus* var. *bracteatus* f. *tricolor*) provides insights into elaboration of leaf color. *G3* **12**, jkab452 (2022).

28. Can M*, et al.* Genome sequence of *Kobresia littledalei*, the first chromosome-level genome in the family Cyperaceae. *Sci. data* **7**, 175 (2020).

29. McKain MR*, et al.* A Phylogenomic assessment of ancient polyploidy and genome evolution across the Poales. *Genome Biol. Evol.* **8**, 1150–1164 (2016).

30. Ma P-F*, et al.* The *Pharus latifolius* genome bridges the gap of early grass evolution. *Plant Cell* **33**, 846–864 (2021).

31. Stein JC*, et al.* Genomes of 13 domesticated and wild rice relatives highlight genetic conservation, turnover and innovation across the genus *Oryza*. *Nat. Genet.* **50**, 285–296 (2018).

32. Li W*, et al.* Draft genomes of two outcrossing wild rice, *Oryza rufipogon* and *O. longistaminata*, reveal genomic features associated with mating-system evolution. *Plant Direct* **4**, e00232 (2020).

33. Jain R*, et al.* Genome sequence of the model rice variety KitaakeX. *BMC Genomics* **20**, 905 (2019).

34. Guo Z-H*, et al.* Genome sequences provide insights into the reticulate origin and unique traits of woody bamboos. *Mol. Plant* **12**, 1353–1365 (2019).

35. Zhao H*, et al.* Chromosome-level reference genome and alternative splicing atlas of moso bamboo (*Phyllostachys edulis*). *Gigascience* **7**, giy115 (2018).

36. Vogel JP*, et al.* Genome sequencing and analysis of the model grass *Brachypodium distachyon*. *Nature* **463**, 763–768 (2010).

37. Mascher M*, et al.* Long-read sequence assembly: a technical evaluation in barley. *Plant Cell* **33**, 1888–1906 (2021).

38. Li G*, et al.* A high-quality genome assembly highlights rye genomic characteristics and agronomically important genes. *Nat. Genet.* **53**, 574–584 (2021).

39. Ling H-Q*, et al.* Genome sequence of the progenitor of wheat A subgenome *Triticum urartu*. *Nature* **557**, 424–428 (2018).

40. Zhao G*, et al.* The *Aegilops tauschii* genome reveals multiple impacts of transposons. *Nat. Plants* **3**, 946–955 (2017).

41. Carballo J*, et al.* A high-quality genome of *Eragrostis curvula* grass provides insights into Poaceae evolution and supports new strategies to enhance forage quality. *Sci. Rep.* **9**, 10250 (2019).

42. Devos KM*, et al.* Genome analyses reveal population structure and a purple stigma color gene candidate in finger millet. *Nat. Commun.* **14**, 3694 (2023).

43. VanBuren R*, et al.* Single-molecule sequencing of the desiccation-tolerant grass *Oropetium thomaeum*. *Nature* **527**, 508–511 (2015).

44. Sun G*, et al.* Genome of *Paspalum vaginatum* and the role of trehalose mediated autophagy in increasing maize biomass. *Nat. Commun.* **13**, 7731 (2022).

45. Kang S-H*, et al.* Genome assembly and annotation of soft-shelled adlay (*Coix lacryma-jobi* variety *mayuen*), a cereal and medicinal crop in the Poaceae family. *Front. Plant Sci.* **11**, 630 (2020).

46. McCormick RF*, et al.* The *Sorghum bicolor* reference genome: improved assembly, gene annotations, a transcriptome atlas, and signatures of genome organization. *Plant J.* **93**, 338–354 (2018).

47. Wang J*, et al.* A high-quality chromosome-scale assembly of the centipedegrass *Eremochloa ophiuroides* (Munro) Hack. genome provides insights into chromosomal structural evolution and prostrate growth habit. *Hortic. Res.* **8**, 201 (2021).

48. Hirsch CN*, et al.* Draft assembly of elite inbred line PH207 provides insights into genomic and transcriptome diversity in maize. *Plant Cell* **28**, 2700–2714 (2016).

49. Studer AJ*, et al.* The draft genome of the C3 panicoid grass species *Dichanthelium oligosanthes*. *Genome Biol.* **17**, 223 (2016).

50. Love JT*, et al.* The genomic landscape of molecular responses to natural drought stress in *Panicum hallii*. *Nat. Commun.* **9**, 5213 (2018).

51. Goodstein DM*, et al.* Phytozome: a comparative platform for green plant genomics. *Nucleic Acids. Res.* **40**, D1178–D1186 (2012).

52. Varshney RK*, et al.* Pearl millet genome sequence provides a resource to improve agronomic traits in arid environments. *Nat. Biotechnol.* **35**, 969–976 (2017).

53. Bennetzen JL*, et al.* Reference genome sequence of the model plant *Setaria*. *Nat. Biotechnol.* **30**, 555–561 (2012).

54. Qin L*, et al.* Insights into angiosperm evolution, floral development and chemical biosynthesis from the *Aristolochia fimbriata* genome. *Nat. Nlants* **7**, 1239–1253 (2021).

55. Hu L*, et al.* The chromosome-scale reference genome of black pepper provides insight into piperine biosynthesis. *Nat. Commun.* **10**, 4702 (2019).

56. Shen Y, Xia H, Tu Z, Zong Y, Yang L, Li H. Genetic divergence and local adaptation of *Liriodendron* driven by heterogeneous environments. *Mol. Ecol.* **31**, 916–933 (2022).

57. Dong S*, et al.* The genome of *Magnolia biondii* Pamp. provides insights into the evolution of Magnoliales and biosynthesis of terpenoids. *Hortic. Res.* **8**, 38 (2021).

58. Lv Q*, et al.* The *Chimonanthus salicifolius* genome provides insight into magnoliid evolution and flavonoid biosynthesis. *Plant J.* **103**, 1910–1923 (2020).

59. Chaw S-M*, et al.* Stout camphor tree genome fills gaps in understanding of flowering plant genome evolution. *Nat. Plants* **5**, 63–73 (2019).

60. Rendon-Anaya M*, et al.* The avocado genome informs deep angiosperm phylogeny, highlights introgressive hybridization, and reveals pathogen-influenced gene space adaptation. *P. Natl. Acad. Sci. USA.* **116**, 17081–17089 (2019).

61. Liu X*, et al.* The Genome of medicinal plant *Macleaya cordata* provides new insights into benzylisoquinoline alkaloids metabolism. *Mol. Plant* **10**, 975–989 (2017).

62. Sun Y*, et al.* Genome sequencing of the endangered *Kingdonia uniflora* (Circaeasteraceae, Ranunculales) reveals potential mechanisms of evolutionary specialization. *iScience* **23**, 101124(2020).

63. Filiault DL*, et al.* The *Aquilegia* genome provides insight into adaptive radiation and reveals an extraordinarily polymorphic chromosome with a unique history. *Elife* **7**, e36426 (2018)

64. Liu Y*, et al.* Analysis of the *Coptis chinensis* genome reveals the diversification of protoberberine-type alkaloids. *Nat. Commun.* **12**, 3276 (2021).

65. Arias T, Riano-Pachon DM, Di Stilio VS. Genomic and transcriptomic resources for candidate gene discovery in the Ranunculids. *Appl. Plant. Sci.* **9**, e11407 (2021).

66. Zheng X*, et al.* Genomic variation reveals demographic history and biological adaptation of the ancient relictual, lotus (*Nelumbo Adans*). *Hortic. Res.* **9**, uhac029 (2022).

67. Falk T*, et al.* Growing and cultivating the forest genomics database, TreeGenes. *Database* **2018**, 1-11 (2018).

68. Li M*, et al.* A chromosome-level genome assembly for the tertiary relict plant *Tetracentron sinense* oliv. (Trochodendraceae). *Mol. Ecol. Resour.* **21**, 1186–1199 (2021).

69. Strijk JS, Hinsinger DD, Zhang F, Cao K. *Trochodendron aralioides*, the first chromosome-level draft genome in Trochodendrales and a valuable resource for basal eudicot research. *Gigascience* **8**, giz136 (2019).

70. Zhao D*, et al.* *De novo* genome assembly of *Camptotheca acuminata*, a natural source of the anti-cancer compound camptothecin. *Gigascience* **6**, 1-7 (2017).

71. Chen Y*, et al.* Genomic analyses of a "living fossil": the endangered dove-tree. *Mol. Ecol. Resour.* **20**, 756-769 (2020).

72. Yang X*, et al.* A chromosome-level genome assembly of the Chinese tupelo *Nyssa sinensis*. *Sci. Data* **6**, 282 (2019).

73. He Z*, et al.* Evolution of coastal forests based on a full set of mangrove genomes. *Nat. Ecol. Evol.* **6**, 738–749 (2022).

74. Cocker JM*, et al.* *Primula vulgaris*(primrose) genome assembly, annotation and gene expression, with comparative genomics on the heterostyly supergene. *Sci. Rep.* **8**, 17942 (2018).

75. Suo Y*, et al.* A high-quality chromosomal genome assembly of *Diospyros oleifera* Cheng. *Gigascience* **9**, giz164 (2020).

76. Hartmann S, Preick M, Abelt S, Scheffel A, Hofreiter M. Annotated genome sequences of the carnivorous plant *Roridula gorgonias* and a non-carnivorous relative, *Clethra arborea*. *BMC Res. Notes.* **13**, 426 (2020).

77. Soza VL*, et al.* The *Rhododendron* genome and chromosomal organization provide insight into sharedwhole-genome duplications across the heath family (Ericaceae). *Genome Biol. Evol.* **11**, 3353–3371 (2019).

78. Diaz-Garcia L, Garcia-Ortega LF, Gonzalez-Rodriguez M, Delaye L, Iorizzo M, Zalapa J. Chromosome-level genome assembly of the american cranberry (*Vaccinium macrocarpon* Ait.) and its wild relative *Vaccinium microcarpum*. *Front. Plant Sci.* **12**, 633310 (2021).

79. Huang S*, et al.* Draft genome of the kiwifruit *Actinidia chinensis*. *Nat. Commun.* **4**, 2640 (2013).

80. Pu X*, et al.* The honeysuckle genome provides insight into the molecular mechanism of carotenoid metabolism underlying dynamic flower coloration. *New Phytol.* **227**, 930–943 (2020).

81. Song X*, et al.* The celery genome sequence reveals sequential paleo-polyploidizations, karyotype evolution and resistance gene reduction in apiales. *Plant Biotechnol. J.* **19**, 731–744 (2021).

82. Song X*, et al.* Deciphering the high-quality genome sequence of coriander that causes controversial feelings. *Plant Biotechnol. J.* **18**, 1444–1456 (2020).

83. Wang Y-H*, et al.* Telomere-to-telomere carrot (*Daucus carota*) genome assembly reveals carotenoid characteristics. *Hortic. Res.* **10**, uhad103 (2023).

84. Wang Z-H*, et al.* Reshuffling of the ancestral core-eudicot genome shaped chromatin topology and epigenetic modification in *Panax*. *Nat. Commun.* **13**, 1902 (2022).

85. Scaglione D*, et al.* The genome sequence of the outbreeding globe artichoke constructed *de novo* incorporating a phase-aware low-pass sequencing strategy of F1 progeny. *Sci. Rep.* **6**, 19427 (2016).

86. Wu Z*, et al.* The chromosome-scale reference genome of safflower (*Carthamus tinctorius*) provides insights into linoleic acid and flavonoid biosynthesis. *Plant Biotechnol. J.* **19**, 1725–1742 (2021).

87. Lin T*, et al.* Extensive sequence divergence between the reference genomes of *Taraxacum kok-saghyz* and *Taraxacum mongolicum*. *Sci. China Life Sci.* **65**, 515–528 (2022).

88. Reyes-Chin-Wo S*, et al.* Genome assembly with *in vitro* proximity ligation data and whole-genome triplication in lettuce. *Nat. Commun.* **8**, 14953 (2017).

89. Song C*, et al.* The *Chrysanthemum nankingense* genome provides insights into the evolution and diversification of *Chrysanthemum* flowers and medicinal traits. *Mol.Plant* **11**, 1482–1491 (2018).

90. Badouin H*, et al.* The sunflower genome provides insights into oil metabolism, flowering and Asterid evolution. *Nature* **546**, 148–152 (2017).

91. Xu X*, et al.* The chromosome-level *Stevia* genome provides insights into steviol glycoside biosynthesis. *Hortic. Res.* **8**, 129 (2021).

92. Liu B*, et al.* *Mikania micrantha* genome provides insights into the molecular mechanism of rapid growth. *Nat. Commun.* **11**, 340 (2020).

93. Wuyun T-n*, et al.* The Hardy rubber tree genome provides insights into the evolution of polyisoprene biosynthesis. *Mol. Plant* **11**, 429–442 (2018).

94. Denoeud F*, et al.* The coffee genome provides insight into the convergent evolution of caffeine biosynthesis. *Science* **345**, 1181–1184 (2014).

95. Lau KH*, et al.* Genome assembly of *Chiococca alba* uncovers key enzymes involved in the biosynthesis of unusual terpenoids. *DNA Res.* **27**, dsaa013 (2020).

96. Franke J*, et al.* Gene discovery in *Gelsemium* highlights conserved gene clusters in monoterpene indole alkaloid biosynthesis. *Chembiochem* **20**, 83–87 (2019).

97. Hoopes GM*, et al.* Genome assembly and annotation of the medicinal plant *Calotropis gigantea*, a producer of anticancer and antimalarial cardenolides. *G3-Genes Genom. Genet.* **8**, 385–391 (2018).

98. Kellner F*, et al.* Genome-guided investigation of plant natural product biosynthesis. *Plant J.* **82**, 680–692 (2015).

99. Auber RP*, et al.* Hybrid *de novo* genome assembly of red gromwell (*Lithospermum erythrorhizon*) reveals evolutionary insight into shikonin biosynthesis. *Hortic. Res.* **7**, 82 (2020).

100. Kim S*, et al.* Genome sequence of the hot pepper provides insights into the evolution of pungency in *Capsicum* species. *Nat. Genet.* **46**, 270–278 (2014).

101. Xu S*, et al.* Wild tobacco genomes reveal the evolution of nicotine biosynthesis. *P. Natl. Acad. Sci. USA.* **114**, 6133–6138 (2017).

102. Bombarely A*, et al.* Insight into the evolution of the Solanaceae from the parental genomes of *Petunia hybrida*. *Nat. Plants* **2**, 16074 (2016).

103. Bolger A*, et al.* The genome of the stress-tolerant wild tomato species *Solanum pennellii*. *Nat. Genet.* **46**, 1034–1038 (2014).

104. Sun G*, et al.* Large-scale gene losses underlie the genome evolution of parasitic plant *Cuscuta australis*. *Nat. Commun.* **9**, 2683 (2018).

105. Hoshino A*, et al.* Genome sequence and analysis of the Japanese morning glory *Ipomoea nil*. *Nat. Commun.* **7**, 13295 (2016).

106. Unver T*, et al.* Genome of wild olive and the evolution of oil biosynthesis. *P. Natl. Acad. Sci. USA.* **114**, E9413–E9422 (2017).

107. Xiao L*, et al.* The resurrection genome of *Boea hygrometrica*: a blueprint for survival of dehydration. *P. Natl. Acad. Sci. USA.* **112**, 5833–5837 (2015).

108. Li M*, et al.* Genome structure and evolution of *Antirrhinum maju*s L. *Nat. Plants* **5**, 174–183 (2019).

109. Wang X*, et al.* The wild allotetraploid sesame genome provides novel insights into evolution and lignan biosynthesis. *J. Adv. Res.* **50**, 13–24 (2023).

110. He Z*, et al.* Convergent adaptation of the genomes of woody plants at the land-sea interface. *Natl. Sci. Rev.* **7**, 978–993 (2020).

111. Xu W*, et al.* Blue genome: chromosome-scale genome reveals the evolutionary and molecular basis of indigo biosynthesis in *Strobilanthes cusia*. *Plant J.* **104**, 864–879 (2020).

112. Silva-Junior OB, Grattapaglia D, Novaes E, Collevatti RG. Genome assembly of the Pink Ipe (*Handroanthus impetiginosus*, Bignoniaceae), a highly valued, ecologically keystone Neotropical timber forest tree. *Gigascience* **7**, 1-16 (2017).

113. Wang M, Zhang L, Wang Z. Chromosomal-level reference genome of the neotropical tree *Jacaranda mimosifolia* D. Don. *Genome Biol. Evol.* **13**, evab094 (2021).

114. Hellsten U*, et al.* Fine-scale variation in meiotic recombination in *Mimulus* inferred from population shotgun sequencing. *P. Natl. Acad. Sci. USA.* **110**, 19478–19482 (2013).

115. Chen B-Z*, et al.* Chromosome-level assembly of *Lindenbergia philippensis* and comparative genomic analyses shed light on genome evolution in Lamiales. *Front. Plant Sci.* **15**, 1444234 (2024).

116. Cui S*, et al.* Ethylene signaling mediates host invasion by parasitic plants. *Sci. Adv.* **6**, eabc2385 (2020).

117. Yoshida S*, et al.* Genome sequence of *Striga asiatica* provides insight into the evolution of plant parasitism. *Current Biology* **29**, 3041–3052 (2019).

118. Hamilton JP*, et al.* Generation of a chromosome-scale genome assembly of the insect-repellent terpenoid-producing Lamiaceae species, *Callicarpa americana*. *Gigascience* **9**, giaa093 (2020).

119. Zhao D*, et al.* A chromosomal-scale genome assembly of *Tectona grandis* reveals the importance of tandem gene duplication and enables discovery of genes in natural product biosynthetic pathways. *Gigascience* **8**, giz005 (2019).

120. Xu Z*, et al.* Comparative genome analysis of *Scutellaria baicalensis* and *Scutellaria barbata* reveals the evolution of active flavonoid biosynthesis. *genom. Proteom. Bioinf.* **18**, 230–240 (2020).

121. Zhang Y*, et al.* Incipient diploidization of the medicinal plant *Perilla* within 10,000 years. *Nat. Commun.* **12**, 5508 (2021).

122. Bornowski N, Hamilton JP, Liao P, Wood JC, Dudareva N, Buell CR. Genome sequencing of four culinary herbs reveals terpenoid genes underlying chemodiversity in the Nepetoideae. *DNA Res.* **27**, dsaa016 (2020).

123. Zheng X*, et al.* Insights into salvianolic acid B biosynthesis from chromosome-scale assembly of the *Salvia bowleyana* genome. *J. Integr. Plant Biol.* **63**, 1309–1323 (2021).

124. Xu C-Q*, et al.* Genome sequence of *Malania oleifera*, a tree with great value for nervonic acid production. *Gigascience* **8**, giy164 (2019).

125. Yasui Y*, et al.* Assembly of the draft genome of buckwheat and its applications in identifying agronomically useful genes. *DNA Res.* **23**, 215–224 (2016).

126. Sturtevant D*, et al.* The genome of jojoba (*Simmondsia chinensis*): a taxonomically isolated species that directs wax ester accumulation in its seeds. *Sci. Adv.* **6**, aay3240 (2020).

127. Zheng J, Meinhardt LW, Goenaga R, Zhang D, Yin Y. The chromosome-level genome of dragon fruit reveals whole-genome duplication and chromosomal co-localization of betacyanin biosynthetic genes. *Hortic. Res.* **8**, 63 (2021).

128. Gilman IS, Moreno-Villena JJ, Lewis ZR, Goolsby EW, Edwards EJ. Gene co-expression reveals the modularity and integration of C4 and CAM in *Portulaca*. *Plant Physiol.* **189**, 735–753 (2022).

129. Clouse JW*, et al.* The amaranth genome: genome, transcriptome, and physical map assembly. *Plant Genome* **9**, 1 (2016).

130. Wang L*, et al.* A draft genome assembly of halophyte *Suaeda aralocaspica*, a plant that performs C4 photosynthesis within individual cells. *Gigascience* **8**, giz116 (2019).

131. Rodriguez del Rio A*, et al.* Genomes of the wild beets *Beta patula* and *Beta vulgaris* ssp. *maritima*. *Plant J.* **99**, 1242–1253 (2019).

132. Xu C*, et al.* Draft genome of spinach and transcriptome diversity of 120 *Spinacia* accessions. *Nat. Commun.* **8**, 15275 (2017).

133. Hunt SP*, et al.* A Chromosome-scale assembly of the garden orach (*Atriplex hortensis* L.) genome using oxford nanopore sequencing. *Front. Plant Sci.* **11**, 624 (2020).

134. Jaillon O*, et al.* The grapevine genome sequence suggests ancestral hexaploidization in major angiosperm phyla. *Nature* **449**, 463–465 (2007).

135. Korgaonkar A*, et al.* A novel family of secreted insect proteins linked to plant gall development. *Curr. Biol.* **31**, 1836–1849 (2021).

136. Yang X*, et al.* The *Kalanchoe* genome provides insights into convergent evolution and building blocks of crassulacean acid metabolism. *Nat. Commun.* **8**, 1899 (2017).

137. Fu Y*, et al.* Draft genome sequence of the Tibetan medicinal herb *Rhodiola crenulata*. *Gigascience* **6**, 1-5 (2017).

138. Chen J*, et al.* Identification of genomic regions associated with differences in flowering time and inflorescence architecture between *Melastoma candidum* and *M. normale*. *Int. J. Mol. Sci.* **25**, 10250 (2024).

139. Detcharoen M, Bumrungsri S, Voravuthikunchai SP. Complete genome of rose myrtle, *Rhodomyrtus tomentosa*, and its population genetics in Thai Peninsula. *Plants-Basel* **12**, 1582 (2023).

140. Voelker J, Shepherd M, Mauleon R. A high-quality draft genome for *Melaleuca alternifolia* (tea tree): anew platform for evolutionary genomics of myrtaceous terpene-rich species. *GigaByte* **2021**, 28 (2021).

141. Healey AL*, et al.* Pests, diseases, and aridity have shaped the genome of *Corymbia citriodora*. *Commun. Biol.* **4**, 537 (2021).

142. Bartholome J*, et al.* High-resolution genetic maps of *Eucalyptus* improve *Eucalyptus grandis* genome assembly. *New Phytol.* **206**, 1283–1296 (2015).

143. Griesmann M*, et al.* Phylogenomics reveals multiple losses of nitrogen-fixing root nodule symbiosis. *Science* **361**, eaat1743 (2018).

144. Matsumura H*, et al.* Long-read bitter gourd (*Momordica charantia*) genome and the genomic architecture of nonclassic domestication. *P. Natl. Acad. Sci. USA.* **117**, 14543–14551 (2020).

145. Montero-Pau J*, et al.* *De novo* assembly of the zucchini genome reveals a whole-genome duplication associated with the origin of the *Cucurbita* genus. *Plant Biotechnol. J.* **16**, 1161–1171 (2018).

146. Wu S*, et al.* The bottle gourd genome provides insights into Cucurbitaceae evolution and facilitates mapping of a *Papaya ring-spot virus* resistance locus. *Plant J.* **92**, 963–975 (2017).

147. Guo S*, et al.* Resequencing of 414 cultivated and wild watermelon accessions identifies selection for fruit quality traits. *Nat. Genet.* **51**, 1616–1623 (2019).

148. Xie D*, et al.* The wax gourd genomes offer insights into the genetic diversity and ancestral cucurbit karyotype. *Nat. Commun.* **10**, 5158 (2019).

149. Castanera R, Ruggieri V, Pujol M, Garcia-Mas J, Casacuberta JM. An Improved melon reference genome with single-molecule sequencing uncovers a recent burst of transposable elements with potential impact on genes. *Front. Plant Sci.* **10**, 1815 (2020).

150. Zhang T*, et al.* Long-read sequencing and *de novo* assembly of the *Luffa cylindrica* (L.) Roem. genome. *Mol. Ecol. Resour.* **20**, 511–519 (2020).

151. Fu A*, et al.* Combined genomic, transcriptomic, and metabolomic analyses provide insights into chayote (*Sechium edule*) evolution and fruit development. *Hortic. Res.* **8**, 35 (2021).

152. Ma L*, et al.* The genome and transcriptome analysis of snake gourd provide insights into its evolution and fruit development and ripening. *Hortic. Res.* **7**, 199 (2020).

153. Yang M*, et al.* Insights into the evolution and spatial chromosome architecture of jujube from an updated gapless genome assembly. *Plant Commun.* **4**, 100662 (2023).

154. Grassa CJ*, et al.* A new *Cannabis* genome assembly associates elevated cannabidiol (CBD) with hemp introgressed into marijuana. *New Phytol.* **230**, 1665–1679 (2021).

155. van Velzen R*, et al.* Comparative genomics of the nonlegume *Parasponia* reveals insights into evolution of nitrogen-fixing rhizobium symbioses. *P. Natl. Acad. Sci. USA.* **115**, E4700–E4709 (2018).

156. Wang Y*, et al.* Genomic analyses provide comprehensive insights into the domestication of bast fiber crop ramie (*Boehmeria nivea*). *Plant J.* **107**, 787–800 (2021).

157. Shirasawa K*, et al.* The *Ficus erecta* genome aids *Ceratocystis* canker resistance breeding in common fig (*F. carica*). *Plant J.* **102**, 1313–1322 (2020).

158. Sahu SK*, et al.* Draft genomes of two *Artocarpus* Plants, Jackfruit (*A. heterophyllus*) and breadfruit (*A. altilis*). *Genes* **11**, (2020).

159. Yang Y*, et al.* Genome Assembly and Population Resequencing Reveal the Geographical Divergence of Shanmei (*Rubus corchorifolius*). *Genom. Proteom. Bioinf.* **20**, 1106–1118 (2022).

160. Edger PP*, et al.* Single-molecule sequencing and optical mapping yields an improved genome of woodland strawberry (*Fragaria vesca*) with chromosome-scale contiguity. *Gigascience* **7**, 27 (2017).

161. Saint-Oyant LH*, et al.* A high-quality genome sequence of *Rosa chinensis* to elucidate ornamental traits. *Nat. plants* **4**, 473–484 (2018).

162. Shirasawa K*, et al.* The genome sequence of sweet cherry (*Prunus avium*) for use in genomics-assisted breeding. *DNA Res.* **24**, 499–508 (2017).

163. Ireland HS*, et al.* The *Gillenia trifoliata* genome reveals dynamics correlated with growth and reproduction in Rosaceae. *Hortic. Res.* **8**, 233 (2021).

164. Jiang S, An H, Xu F, Zhang X. Chromosome-level genome assembly and annotation of the loquat (*Eriobotrya japonica*) genome. *Gigascience* **9**, giaa015 (2020).

165. Daccord N*, et al.* High-quality *de novo* assembly of the apple genome and methylome dynamics of early fruit development. *Nat. Genet.* **49**, 1099–1106 (2017).

166. Dong X*, et al.* *De novo* assembly of a wild pear (*Pyrus betuleafolia*) genome. *Plant Biotechnol. J.* **18**, 581–595 (2020).

167. Westbrook JW*, et al.* Optimizing genomic selection for blight resistance in American chestnut backcross populations: a trade-off with American chestnut ancestry implies resistance is polygenic. *Evol. Appl.* **13**, 31–47 (2020).

168. Ramos AM*, et al.* The draft genome sequence of cork oak. *Sci. Data* **5**, 180069 (2018).

169. Huang Y*, et al.* The genomes of pecan and Chinese hickory provide insights into Carya evolution and nut nutrition. *Gigascience* **8**, giz036 (2019).

170. Li Y*, et al.* The *Corylus mandshurica* genome provides insights into the evolution of Betulaceae genomes and hazelnut breeding. *Hortic. Res.* **8**, 54 (2021).

171. Yang X, Wang Z, Zhang L, Hao G, Liu J, Yang Y. A chromosome-level reference genome of the hornbeam, *Carpinus fangiana*. *Sci. Data* **7**, 24 (2020).

172. Yang Y*, et al.* Genomic effects of population collapse in a critically endangered ironwood tree *Ostrya rehderiana*. *Nat. Commun.* **9**, 5449 (2018).

173. Chang Y*, et al.* The draft genomes of five agriculturally important African orphan crops. *Gigascience* **8**, giy152 (2019).

174. Kang S-H*, et al.* Genome-enabled discovery of anthraquinone biosynthesis in *Senna tora*. *Nat. Commun.* **11**, 5875 (2020).

175. Hane JK*, et al.* A comprehensive draft genome sequence for lupin (*Lupinus angustifolius*), an emerging health food: insights into plant-microbe interactions and legume evolution. *Plant Biotechnol. J.* **15**, 318–330 (2017).

176. Gao F*, et al.* Long-read sequencing and *de novo* genome assembly of *Ammopiptanthus nanus*, a desert shrub. *Gigascience* **7**, giy074 (2018).

177. Lu Q*, et al.* Genome sequencing and analysis of the peanut B-genome progenitor (*Arachis ipaensis*). *Front. Plant Sci.* **9**, 604 (2018).

178. Quilbe J*, et al.* Genetics of nodulation in *Aeschynomene evenia* uncovers mechanisms of the rhizobium-legume symbiosis. *Nat. Commun.* **12**, 829 (2021).

179. Hong Z*, et al.* The chromosome-level draft genome of *Dalbergia odorifera*. *Gigascience* **9**, giaa084 (2020).

180. Kamal N*, et al.* Insights into the evolution of symbiosis gene copy number and distribution from a chromosome-scale *Lotus japonicus* Gifu genome sequence. *DNA Res.* **27**, dsaa015 (2020).

181. Varshney RK*, et al.* Draft genome sequence of chickpea (*Cicer arietinum*) provides a resource for trait improvement. *Nat. Biotechnol.* **31**, 240–246 (2013).

182. Yang T*, et al.* Improved pea reference genome and pan-genome highlight genomic features and evolutionary characteristics. *Nat. Genet.* **54**, 1553–1563 (2022).

183. Tang H*, et al.* An improved genome release (version Mt4.0) for the model legume *Medicago truncatula*. *BMC Genomics* **15**, 312 (2014).

184. De Vega JJ*, et al.* Red clover (*Trifolium pratense* L.) draft genome provides a platform for trait improvement. *Sci. Rep.* **5**, 17394 (2015).

185. Qin S*, et al.* A draft genome for *Spatholobus suberectus*. *Sci. Data* **6**, 113 (2019).

186. Varshney RK*, et al.* Draft genome sequence of pigeonpea (*Cajanus cajan*), an orphan legume crop of resource-poor farmers. *Nat. Biotechnol.* **30**, 83–128 (2012).

187. Song T*, et al.* Chromosome-scale reference genome of *Amphicarpaea edgeworthii*: a new resource for amphicarpic plants research and complex flowering pattern. *Front. Plant Sci.* **12**, 770660 (2021).

188. Vlasova A*, et al.* Genome and transcriptome analysis of the Mesoamerican common bean and the role of gene duplications in establishing tissue and temporal specialization of genes. *Genome Biol.* **17**, 32 (2016).

189. Liu C*, et al.* High-quality genome assembly and pan-genome studies facilitate genetic discovery in mung bean and its improvement. *Plant Commun.* **3**, 100352 (2022).

190. Tu L*, et al.* Genome of *Tripterygium wilfordii* and identification of cytochrome P450 involved in triptolide biosynthesis. *Nat. Commun.* **11**, 971 (2020).

191. He Z*, et al.* Evolution of coastal forests based on a full set of mangrove genomes. *Nat. Ecol. Evol.* **6**, 738–749 (2022).

192. Hu M-J*, et al.* Chromosome-scale assembly of the *Kandelia obovata* genome. *Hortic. Res.* **7**, 75 (2020).

193. Costa ZP*, et al.* A genome sequence resource for the genus *Passiflora*, the genome of the wild diploid species *Passiflora organensis*. *Plant Genome* **14**, e20117 (2021).

194. Ma J*, et al.* Genome sequence and genetic transformation of a widely distributed and cultivated poplar. *Plant Biotechnol. J.* **17**, 451–460 (2019).

195. Hyden B*, et al.* *De novo* assembly and annotation of 11 diverse shrub willow (*Salix*) genomes reveals novel gene organization in sex-linked regions. *Int. J. Mol. Sci.* **24**, 2904 (2023).

196. Chan AP*, et al.* Draft genome sequence of the oilseed species *Ricinus communis*. *Nat. Biotechnol.* **28**, 951–953 (2010).

197. Wang M, Gu Z, Fu Z, Jiang D. High-quality genome assembly of an important biodiesel plant, *Euphorbia lathyris* L. *DNA Res.* **28**, dsab022 (2021).

198. Bredeson JV*, et al.* Sequencing wild and cultivated cassava and related species reveals extensive interspecific hybridization and genetic diversity. *Nat. Biotechnol.* **34**, 562–570 (2016).

199. Cui P*, et al.* Tung Tree (*Vernicia fordii,* Hemsl.) genome and transcriptome sequencing reveals co-ordinate up-regulation of fatty acid β-oxidation and triacylglycerol biosynthesis pathways during eleostearic acid accumulation in seeds. *Plant Cell Physiol.* **59**, 1990–2003 (2018).

200. Sato S*, et al.* Sequence analysis of the genome of an oil-bearing tree, *Jatropha curcas* L. *DNA Res.* **18**, 65–76 (2011).

201. Fukushima K*, et al.* Genome of the pitcher plant *Cephalotus* reveals genetic changes associated with carnivory. *Nat. Ecol. Evol.* **1**, 59 (2017).

202. Wu S*, et al.* The genome sequence of star fruit (*Averrhoa carambola*). *Hortic. Res.* **7**, 95 (2020).

203. Bi Q*, et al.* Pseudomolecule-level assembly of the Chinese oil tree yellowhorn (*Xanthoceras sorbifolium*) genome. *Gigascience* **8**, giz070 (2019).

204. Yang J*, et al.* *De novo* genome assembly of the endangered *Acer yangbiense*, a plant species with extremely small populations endemic to Yunnan Province, China. *Gigascience* **8**, giz085 (2019).

205. Xue T*, et al.* Chromosome-scale assembly and population diversity analyses provide insights into the evolution of *Sapindus mukorossi*. *Hortic. Res.* **9**, uhac012 (2022).

206. Lin Y*, et al.* Genome-wide sequencing of longan (*Dimocarpus longan* Lour.) provides insights into molecular basis of its polyphenol-rich characteristics. *Gigascience* **6**, 1-14 (2017).

207. Ji Y-T*, et al.* Long read sequencing of *Toona sinensis* (A. Juss) Roem: A chromosome-level reference genome for the family Meliaceae. *Mol. Ecol. Resour.* **21**, 1243–1255 (2021).

208. Xiong Z, Yin H, Wang N, Han G, Gao Y. Chromosome-level genome assembly of navel orange cv. Gannanzao (*Citrus sinensis* Osbeck cv. Gannanzao). *G3-Genes Genom. Genet.* **14**, jkad268 (2024).

209. Peng Z*, et al.* A chromosome-scale reference genome of trifoliate orange (P*oncirus trifoliata)* provides insights into disease resistance, cold tolerance and genome evolution in *Citrus*. *Plant J.* **104**, 1215–1232 (2020).

210. Zeng L*, et al.* Whole genomes and transcriptomes reveal adaptation and domestication of pistachio. *Genome Biol.* **20**, 79 (2019).

211. Savadi S*, et al.* *De novo* assembly and characterization of the draft genome of the cashew (*Anacardium occidentale* L.). *Sci. Rep.* **12**, 18187 (2022).

212. Li W*, et al.* SMRT sequencing generates the chromosome-scale reference genome of tropical fruit mango, *Mangifera indica*. *biorxiv*, doi: 10.1101/2020.02.22.960880 (2020).

213. Ding X*, et al.* Genome sequence of the agarwood tree *Aquilaria sinensis* (Lour.) Spreng: the first chromosome-level draft genome in the Thymelaeceae family. *Gigascience* **9**, giaa013 (2020).

214. Zhang L*, et al.* Reference genomes of the two cultivated jute species. *Plant Biotechnol. J.* **19**, 2235–2248 (2021).

215. Motamayor JC*, et al.* The genome sequence of the most widely cultivated cacao type and its use to identify candidate genes regulating pod color. *Genome Biol.* **14**, r53 (2013).

216. Hong S, Lim YP, Kwon S-Y, Shin A-Y, Kim Y-M. Genome-wide comparative analysis of flowering-time genes; insights on the gene family expansion and evolutionary perspective. *Front. Plant Sci.* **12**, 702243 (2021).

217. Teh BT*, et al.* The draft genome of tropical fruit durian (*Durio zibethinus*). *Nat. Genet.* **49**, 1633–1641 (2017).

218. Gao Y*, et al.* *De novo* genome assembly of the red silk cotton tree (*Bombax ceiba*). *Gigascience* **7**, giy051 (2018).

219. Zhang L*, et al.* The genome of kenaf (*Hibiscus cannabinus* L.) provides insights into bast fibre and leaf shape biogenesis. *Plant Biotechnol. J.* **18**, 1796–1809 (2020).

220. Chen F*, et al.* The sequenced angiosperm genomes and genome databases. *Front. Plant Sci.* **9**, 418 (2018).

221. Ming R*, et al.* The draft genome of the transgenic tropical fruit tree papaya (*Carica papay* Linnaeus). *Nature* **452**, 991–997 (2008).

222. Cheng S*, et al.* The *Tarenaya hassleriana* genome provides insight into reproductive trait and genome evolution of crucifers. *Plant Cell* **25**, 2813–2830 (2013).

223. Haudry A*, et al.* An atlas of over 90,000 conserved noncoding sequences provides insight into crucifer regulatory regions. *Nat. Genet.* **45**, 891–898 (2013).

224. Gan X*, et al.* The *Cardamine hirsuta* genome offers insight into the evolution of morphological diversity. *Nat. Plants* **2**, 16167 (2016).

225. Kaul S*, et al.* Analysis of the genome sequence of the flowering plant *Arabidopsis thaliana*. *Nature* **408**, 796–815 (2000).

226. Lee C-R*, et al.* Young inversion with multiple linked QTLs under selection in a hybrid zone. *Nat. Ecol. Evol.* **1**, 119 (2017).

227. Slotte T*, et al.* The *Capsella rubella* genome and the genomic consequences of rapid mating system evolution. *Nat. Genet.* **45**, 831–835 (2013).

228. Huang L*, et al.* A chromosome-scale reference genome of *Lobularia maritima*, an ornamental plant with high stress tolerance. *Hortic. Res.* **7**, 197 (2020).

229. Yang W*, et al.* The chromosome-level genome sequence and karyotypic evolution ofn *Megadenia pygmaea*(Brassicaceae). *Mol. Ecol. Resour.* **21**, 871–879 (2021).

230. Nowak MD*, et al.* The genome of *Draba nivalis* shows signatures of adaptation to the extreme environmental stresses of the Arctic. *Mol. Ecol. Resour.* **21**, 661–676 (2021).

231. Willing E-M*, et al.* Genome expansion of *Arabis alpina* linked with retrotransposition and reduced symmetric DNA methylation. *Nat. plants* **1**, 1–7 (2015).

232. Yang Q*, et al.* The Genome sequence of alpine *Megacarpaea delavayi* identifies species-specific whole-genome duplication. *Front. Genet.* **11**, 812 (2020).

233. Mishra B*, et al.* The genome of *Microthlaspi erraticum* (Brassicaceae) provides insights into the adaptation to highly calcareous soils. *Front. Plant Sci.* **11**, 943 (2020).

234. Dorn KM, Fankhauser JD, Wyse DL, Marks MD. A draft genome of field pennycress (*Thlaspi arvense*) provides tools for the domestication of a new winter biofuel crop. *DNA Res.* **22**, 121–131 (2015).

235. Yang R*, et al.* The reference genome of the halophytic plant *Eutrema salsugineum*. *Front. Plant Sci.* **4**, 46 (2013).

236. Dassanayake M*, et al.* The genome of the extremophile crucifer *Thellungiella parvula*. *Nat. Genet.* **43**, 913–918 (2011).

237. Zhang T*, et al.* Genome of *Crucihimalaya himalaica*, a close relative of *Arabidopsis*, shows ecological adaptation to high altitude. *P. Natl. Acad. Sci. USA.* **116**, 7137–7146 (2019).

238. Liu S*, et al.* The *Brassica oleracea* genome reveals the asymmetrical evolution of polyploid genomes. *Nat. Commun.* **5**, 3930 (2014).

239. Zhang X*, et al.* A *de novo* genome of a Chinese radish cultivar. *Hortic. Plant. J.* **1**, 155–164 (2015).
