# Supplementary material for: Ginger genome enables identification of SMPED1 causing sex-phase synchrony and outcrossing in a flowering plant
Source: Research Square preprint supplement (doi:10.21203/rs.3.rs-5849960/v1), 2025-02-13
Supplement: Supplementary file 2 [file 43e1dcddd6f692a4749bdf9f.xlsx]

## Sheet: Sheet1
Supplementary Table 7 Summary for resequencing data.
Sample	Morph	Total reads	Total base (Gb)	Depth (x)	Mapping rate (%)	Properly paired mapping rate (%)
PA10	PA	242681898	36.4023	16.7752	97.08	93.95
PA11	PA	249355554	37.4033	17.2366	97.85	92.58
PA1	PA	293448656	44.0173	20.2845	99.37	92.03
PA12	PA	255717568	38.3576	17.6763	94.89	89.14
PA13	PA	326354912	48.9532	22.5591	98.31	86.66
PA14	PA	346366632	51.955	23.9424	98.66	89.15
PA15	PA	345458196	51.8187	23.8796	99.21	88.61
PA16	PA	304763426	45.7145	21.0666	99.82	94.32
PA17	PA	294309456	44.1464	20.344	99.83	96.11
PA18	PA	260157486	39.0236	17.9832	99.87	89.56
PA19	PA	285295040	42.7943	19.7209	99.84	81.55
PA20	PA	367608472	55.1413	25.4107	99.64	87.91
PA2	PA	279725146	41.9588	19.3358	99.27	89.72
PA22	PA	330888832	49.6333	22.8725	99.83	89.35
PA23	PA	328772456	49.3159	22.7262	99.82	79.7
PA24	PA	327686688	49.153	22.6512	99.78	96.72
PA25	PA	342573332	51.386	23.6802	99.6	94.7
PA26	PA	367463298	55.1195	25.4007	99.68	90.07
PA27	PA	403952080	60.5928	27.923	99.61	92.16
PA28	PA	288601966	43.2903	19.9494	99.67	87.34
PA29	PA	403576230	60.5364	27.897	99.67	87.89
PA30	PA	339382894	50.9074	23.4596	99.41	89.33
PA31	PA	333379712	50.007	23.0447	99.71	94.32
PA3	PA	368588318	55.2882	25.4785	99.58	92.83
PA32	PA	347506316	52.1259	24.0212	99.52	88.3
PA33	PA	291268610	43.6903	20.1338	99.38	96.52
PA34	PA	370259946	55.539	25.594	98.72	95.94
PA35	PA	377114732	56.5672	26.0678	99.41	87.63
PA36	PA	293919646	44.0879	20.317	99.69	89.74
PA37	PA	305904890	45.8857	21.1455	99.52	82.21
PA38	PA	343472164	51.5208	23.7423	99.67	83.56
PA39	PA	339047896	50.8572	23.4365	99.67	83.95
PA40	PA	413394066	62.0091	28.5756	99.66	93.45
PA41	PA	350021986	52.5033	24.1951	99.76	87.81
PA4	PA	297560452	44.6341	20.5687	98.97	83.61
PA42	PA	329295100	49.3943	22.7623	99.71	89.15
PA43	PA	338301632	50.7452	23.3849	99.71	84.92
PA44	PA	426556598	63.9835	29.4855	99.42	85.14
PA45	PA	350944224	52.6416	24.2588	99.61	95.41
PA46	PA	366559124	54.9839	25.3382	99.76	95.14
PA47	PA	342681600	51.4022	23.6877	99.67	94.23
PA48	PA	409478052	61.4217	28.3049	99.28	97.33
PA49	PA	348643006	52.2965	24.0997	99.71	89.38
PA50	PA	339074722	50.8612	23.4383	99.74	93.12
PA5	PA	342693806	51.4041	23.6885	99.05	90.85
PA6	PA	330847970	49.6272	22.8697	99.26	88.69
PA7	PA	409117762	61.3677	28.28	98.27	92.5
PA8	PA	230241848	34.5363	15.9153	99.24	94.04
PA9	PA	318707468	47.8061	22.0305	99.1	82.29
PG10	PG	340142366	51.0214	23.5121	99.42	79.87
PG11	PG	292191694	43.8288	20.1976	98.51	88.82
PG1	PG	386760806	58.0141	26.7346	99.22	90.63
PG13	PG	335606838	50.341	23.1986	99.41	87.99
PG14	PG	270849862	40.6275	18.7223	99.81	87.08
PG15	PG	281089596	42.1634	19.4302	99.49	82.62
PG16	PG	431049670	64.6575	29.7961	99.72	92.76
PG18	PG	356059946	53.409	24.6124	99.57	91.04
PG19	PG	383801692	57.5703	26.5301	99.61	94.07
PG20	PG	358574268	53.7861	24.7862	99.53	96.29
PG21	PG	364882820	54.7324	25.2223	99.56	81.76
PG22	PG	376734652	56.5102	26.0416	99.62	90.39
PG23	PG	358352228	53.7528	24.7709	99.57	96.25
PG24	PG	428626974	64.294	29.6286	99.45	94.17
PG25	PG	370145390	55.5218	25.5861	99.33	90.55
PG26	PG	382542602	57.3814	26.443	99.63	91.21
PG27	PG	383045120	57.4568	26.4778	99.71	90.7
PG28	PG	379294164	56.8941	26.2185	99.57	90.59
PG29	PG	363972950	54.5959	25.1594	99.67	90.12
PG30	PG	374244398	56.1367	25.8694	99.74	91.48
PG3	PG	296579548	44.4869	20.5009	99.52	86.84
PG32	PG	373897754	56.0847	25.8455	99.32	95.98
PG33	PG	441428036	66.2142	30.5135	99.74	91.63
PG34	PG	361124138	54.1686	24.9625	99.74	82.95
PG35	PG	325123386	48.7685	22.474	99.74	91.82
PG36	PG	325781058	48.8672	22.5194	99.59	96.21
PG37	PG	252581984	37.8873	17.4596	99.47	97.04
PG39	PG	243995760	36.5994	16.8661	99.74	97.6
PG40	PG	545233944	81.7851	37.689	99.47	91.03
PG41	PG	392869820	58.9305	27.1569	99.49	93.86
PG4	PG	272004750	40.8007	18.8022	99.21	92.27
PG42	PG	184555800	27.6834	12.7573	99.58	97.33
PG43	PG	355800594	53.3701	24.5945	99.65	94.09
PG44	PG	385282810	57.7924	26.6325	99.7	93.34
PG45	PG	398373944	59.7561	27.5374	99.58	92.71
PG46	PG	401111376	60.1667	27.7266	99.67	93.67
PG47	PG	290986446	43.648	20.1143	99.48	96.1
PG48	PG	444703924	66.7056	30.7399	99.54	93.52
PG5	PG	267516442	40.1275	18.4919	99.19	89.38
PG6	PG	297351028	44.6027	20.5542	99.45	78.14
PG7	PG	300626808	45.094	20.7807	99.19	89.26
PG9	PG	324094198	48.6141	22.4028	99.04	83.3
