# Supplementary material for: Ginger genome enables identification of SMPED1 causing sex-phase synchrony and outcrossing in a flowering plant
Source: Research Square preprint supplement (doi:10.21203/rs.3.rs-5849960/v1), 2025-02-13
Supplement: Supplementary file 3 [file 830e6babda26d61381b6bd34.docx]

**SupplementaryTable 1 Observations of morph ratios in natural populations and F1 offspring from controlled crosses in *Alpinia* species.** *G*-test of goodness-of-fit was used to test if the observed morph ratio deviated significantly from expected morph ratio from Mendelian inheritance for a single diallic locus with dominance, and from the 1:1 morph ratio expected from phenotypic disassortative mating in natural populations.

| **Speciesa** | **Population** | **Morph** | **N** | **Expected ratio** | ***G*** | ***Ptwo-tailed*** |
| --- | --- | --- | --- | --- | --- | --- |
| *A. kwangsiensis* | NGS | PG | 93 | 1 : 1 | 3.256 | 0.071 |
| PA | 70 |
| GGL | PG | 37 | 1 : 1 | 0.450 | 0.502 |
| PA | 43 |
| PW | PG | 36 | 1 : 1 | 0.130 | 0.718 |
| PA | 33 |
| as a whole | PG | 166 | 1 : 1 | 1.283 | 0.257 |
| PA | 146 |
| *A. blepharocalyx* | CYH | PG | 705 | 1 : 1 | 3.499 | 0.061 |
| PA | 777 |
| LPX | PG | 33 | 1 : 1 | 1.320 | 0.251 |
| PA | 43 |
| WXT | PG | 138 | 1 : 1 | 0.376 | 0.54 |
| PA | 128 |
| as a whole | PG | 876 | 1 : 1 | 2.843 | 0.092 |
| PA | 948 |
| *A. galanga* | ML | PG | 32 | 1 : 1 | 3.351 | 0.067 |
| PA | 19 |
| MLG | PG | 39 | 1 : 1 | 3.746 | 0.053 |
| PA | 58 |
| GLB | PG | 20 | 1 : 1 | 0.026 | 0.873 |
| PA | 19 |
| as a whole | PG | 91 | 1 : 1 | 0.134 | 0.715 |
| PA | 96 |
| *A. oblongifolia* | NGH | PG | 42 | 1 : 1 | 0.637 | 0.425 |
| PA | 35 |
| SK | PG | 190 | 1 : 1 | 1.000 | 0.317 |
| PA | 171 |
| as a whole | PG | 232 | 1 : 1 | 1.544 | 0.214 |
| PA | 206 |
| **Speciesb** | **Population** | **Morph** | **N** | **Expected ratio** | ***G*** | ***Ptwo-tailed*** |
| *A. mutica* | PG-selfing | PG | 77 | 3 : 1 | 0.083 | 0.773 |
| PA | 24 |
| PA-selfing | PG | 1 | 0 : 1 | NA | NA |
| PA | 99 |
| PG(♀)xPA(♂) | PG | 32 | 1 : 1 | 0.148 | 0.701 |
| PA | 29 |
| PA(♀)xPG(♂) | PG | 26 | 1 : 1 | 0.533 | 0.465 |
| PA | 21 |
| *A. kwangsiensis* | PG-selfing | PG | 61 | 3 : 1 | 0.104 | 0.747 |
| PA | 19 |
| PA-selfing | PG | 0 | 0 : 1 | NA | NA |
| PA | 87 |
| PG(♀)xPA(♂) | PG | 42 | 1 : 1 | 0.012 | 0.914 |
| PA | 43 |
| PA(♀)xPG(♂) | PG | 45 | 1 : 1 | 0.103 | 0.748 |
| *PA* | 42 |

a, investigation from natural populations; b, results of hand pollination. NA means *G*-test of goodness-of-fit cannot be performed due to the “0”.
