# Supplementary material for: Ginger genome enables identification of SMPED1 causing sex-phase synchrony and outcrossing in a flowering plant
Source: Research Square preprint supplement (doi:10.21203/rs.3.rs-5849960/v1), 2025-02-13
Supplement: Supplementary file 4 [file b1a64d2006b82ef78fd88dd3.xlsx]

## Sheet: Sheet1
Supplementary Table 8 Summary of whole-genome variations identified in A. mutica accessions.
Variants	Type	Basic set
SNPs	Total	12712117
	Intergenic	10462352
	Intronic	1185817
	Exonic	226130
	upstream	416523
	downstream	368497
	upstream;downstream	51951
	Splicing	756
	exonic;splicing	91
Variants	Type	Basic set
SNP	Total (Exonic+exonic;splicing)	226221
	Nonsynonymous	128071
	Synonymous	93298
	Nonsyn/Syn Ratio	1.37
	Stop-gain	3846
	Stop-loss	1006
