# Supplementary material for: Ginger genome enables identification of SMPED1 causing sex-phase synchrony and outcrossing in a flowering plant
Source: Research Square preprint supplement (doi:10.21203/rs.3.rs-5849960/v1), 2025-02-13
Supplement: Supplementary file 5 [file c0e724bb51159c5d4a310ff8.xlsx]

## Sheet: Sheet1
Supplementary Table 2 Summary of Illumina sequencing data for PA-morph.
Library	Insert Size (bp)	Reads Number	Bases (Gb)
DMJ-3	400	688302382	103.25
DMJ-5	500	650874762	97.635
DMJ-6	600	787148788	118.075
Total	-	-	318.96
