# Supplementary material for: Ginger genome enables identification of SMPED1 causing sex-phase synchrony and outcrossing in a flowering plant
Source: Research Square preprint supplement (doi:10.21203/rs.3.rs-5849960/v1), 2025-02-13
Supplement: Supplementary file 6 [file da6f2c4ff113548cfa164455.xlsx]

## Sheet: Sheet1
Supplementary Table 5 Summary for alignment of Hi-C data against PA-morph H2 genome using Juicer.
Type	Reads /Ratio
Sequenced Read Pairs	617686391
Normal Paired	194,849,959 (31.55%)
Chimeric Paired	180,676,006 (29.25%)
Chimeric Ambiguous	239,443,975 (38.76%)
Unmapped	2,716,451 (0.44%)
Ligation Motif Present	420,690,048 (68.11%)
Alignable (Normal+Chimeric Paired)	375,525,965 (60.80%)
Unique Reads	322,827,057 (52.26%)
PCR Duplicates	9,686,237 (1.57%)
Optical Duplicates	43,012,671 (6.96%)
Library Complexity Estimate	5595944998
Intra-fragment Reads	4,407,473 (0.71% / 1.37%)
Below MAPQ Threshold	164,685,676 (26.66% / 51.01%)
Hi-C Contacts	153,733,908 (24.89% / 47.62%)
Ligation Motif Present	73,219,594 (11.85% / 22.68%)
3' Bias (Long Range)	58% - 42%
Pair Type %(L-I-O-R)	25% - 25% - 25% - 25%
Inter-chromosomal	68,388,685 (11.07% / 21.18%)
Intra-chromosomal	85,345,223 (13.82% / 26.44%)
Short Range (<20Kb)	36,991,790 (5.99% / 11.46%)
Long Range (>20Kb)	48,352,911 (7.83% / 14.98%)
