# Supplementary material for: Ginger genome enables identification of SMPED1 causing sex-phase synchrony and outcrossing in a flowering plant
Source: Research Square preprint supplement (doi:10.21203/rs.3.rs-5849960/v1), 2025-02-13
Supplement: Supplementary file 7 [file e712dbb9508147a40ee16d87.xlsx]

## Sheet: Sheet2
Supplementary Table 4 Summary of genome assemblies.
Type	Description	PA H1 - ragtag	PA H2 - 3d-dna	PG H1 - ragtag	PG H2 - ragtag
Contig	Total length	2192172391	2171502457	2197966839	2168746510
	Total number	1211	414	1199	432
	N50	77667651	80916331	86320325	80901104
Chromosome	Chr. number	24	24	24	24
	Anchored contig length	2146559487	2138564728	2157696371	2151261041
	Anchored contig number	274	67	288	169
	Ratio of anchors (%)	97.9193	98.4832	98.1678	99.1938
	BUSCO of genome a	C:98.7%[S:90.6%,D:8.1%]	C:98.7%[S:91.0%,D:7.7%]	C:98.6%[S:90.1%,D:8.5%]	C:98.7%[S:90.5%,D:8.2%]
TE	Count	2349049	2293723	2446609	2299573
	bpMasked	1858261329	1840529898	1862690816	1846139737
	Content (%)	84.77	84.76	84.75	85.12
Gene	Gene number	50923	49331	50421	51102
	Transcript number	61202	59308	61921	61231
	Average mRNA length b	4199.92	4374.39	4265.99	4230.52
	Average exon length b	251.12	245.43	248.33	245.57
	Average CDS length b	1007.31	1005.56	1005.64	982.26
	BUSCO of genes a	C:98.6%[S:66.6%,D:32.0%]	C:98.7%[S:67.7%,D:31.0%]	C:98.7%[S:66.0%,D:32.7%]	C:98.7%[S:65.2%,D:33.5%]
a Total number of BUSCOs: 1,614; embryophyta_odb10; Creation date: 2020-09-10
b Stat a transcript for a gene
