# Supplementary material for: Ginger genome enables identification of SMPED1 causing sex-phase synchrony and outcrossing in a flowering plant
Source: Research Square preprint supplement (doi:10.21203/rs.3.rs-5849960/v1), 2025-02-13
Supplement: Supplementary file 8 [file f43a208b0057f142ca53f080.xlsx]

## Sheet: Sheet1
Supplementary Table 3 Statistics of PacBio HiFi reads.
Morph	Total length (bp)	N50 (bp)	Total number	Average length (bp)
PA	197251209416	17206	11384178	17326
PG	184943968655	16707	11078230	16694
