# Supplementary material for: Ginger genome enables identification of SMPED1 causing sex-phase synchrony and outcrossing in a flowering plant
Source: Research Square preprint supplement (doi:10.21203/rs.3.rs-5849960/v1), 2025-02-13
Supplement: Supplementary file 9 [file fe3c67350c9e37be0402f4b8.xlsx]

## Sheet: Table S6-1 PA H1
Supplementary Table 6-1 Summary of TEs in PA-morph H1.
Class	Class	Count	bpMasked	%masked
LTR
	Copia	796782	844791040	0.3854
	Gypsy	446234	478463555	0.2183
	unknown	477534	268719434	0.1226
TIR
	CACTA	84710	37032704	0.0169
	Mutator	261316	93229124	0.0425
	PIF_Harbinger	12276	4537858	0.0021
	Tc1_Mariner	11573	4587092	0.0021
	hAT	31039	11255399	0.0051
	unknown	49	9536	0
nonLTR
	LINE_element	1147	241085	0.0001
	Penelope	2	137	0
	SINE_element	73	11142	0
nonTIR
	helitron	72188	49380712	0.0225
repeat_region		153828	65905260	0.0301
unknown		298	97251	0
Total		2349049	1858261329	0.8477
Supplementary Table 6-2 Summary of TEs in PA-morph H2.
Class	Class	Count	bpMasked	%masked
LTR
	Copia	752416	801363346	0.369
	Gypsy	434684	471835549	0.2173
	unknown	518392	305359845	0.1406
TIR
	CACTA	94568	46554541	0.0214
	Mutator	246893	106795930	0.0492
	PIF_Harbinger	11274	3968547	0.0018
	Tc1_Mariner	9217	3908186	0.0018
	hAT	30183	10847730	0.005
	unknown	49	9351	0
nonLTR
	LINE_element	1812	542536	0.0002
	Penelope	2	230	0
	SINE_element	40	6002	0
nonTIR
	helitron	60199	39059718	0.018
repeat_region		133758	50151869	0.0231
unknown		236	126518	0.0001
Total		2293723	1840529898	0.8476
Supplementary Table 6-3 Summary of TEs in PG-morph H1.
Class	Class	Count	bpMasked	%masked
LTR
	Copia	771862	800979352	0.3644
	Gypsy	429766	443715392	0.2019
	unknown	563279	314569854	0.1431
TIR
	CACTA	98624	47334075	0.0215
	Mutator	328076	131893468	0.06
	PIF_Harbinger	21681	5557735	0.0025
	Tc1_Mariner	10581	3841846	0.0017
	hAT	28775	10836167	0.0049
	unknown	57	11259	0
nonLTR
	LINE_element	1644	381700	0.0002
	Penelope	5	466	0
	SINE_element	43	6475	0
nonTIR
	helitron	56045	43603753	0.0198
repeat_region		135920	59866205	0.0272
unknown		251	93069	0
Total		2446609	1862690816	0.8475
Supplementary Table 6-4 Summary of TEs in PG-morph H2.
Class	Class	Count	bpMasked	%masked
LTR
	Copia	751125	812775075	0.3748
	Gypsy	447906	465368980	0.2146
	unknown	469044	280692823	0.1294
TIR
	CACTA	91552	41079999	0.0189
	Mutator	266289	118528890	0.0547
	PIF_Harbinger	10436	4070568	0.0019
	Tc1_Mariner	11237	4343554	0.002
	hAT	24211	8904399	0.0041
	unknown	49	9497	0
nonLTR
	LINE_element	1704	631397	0.0003
	Penelope	4	375	0
	SINE_element	52	7981	0
nonTIR
	helitron	87285	62580060	0.0289
repeat_region		138416	47048733	0.0217
unknown		263	97406	0
Total		2299573	1846139737	0.8512
